# Supplementary material for: Prevention of CMV/EBV reactivation by double-specific T cells in patients after allogeneic stem cell transplantation: results from the randomized phase I/IIa MULTIVIR-01 study
Source: PubMed Central journal article supplement (PMC10642256; doi:10.3389/fimmu.2023.1251593), 2023-10-30
Supplement: Presentation_1.pdf [file Presentation_1.pdf]

Supplementary Figure 1

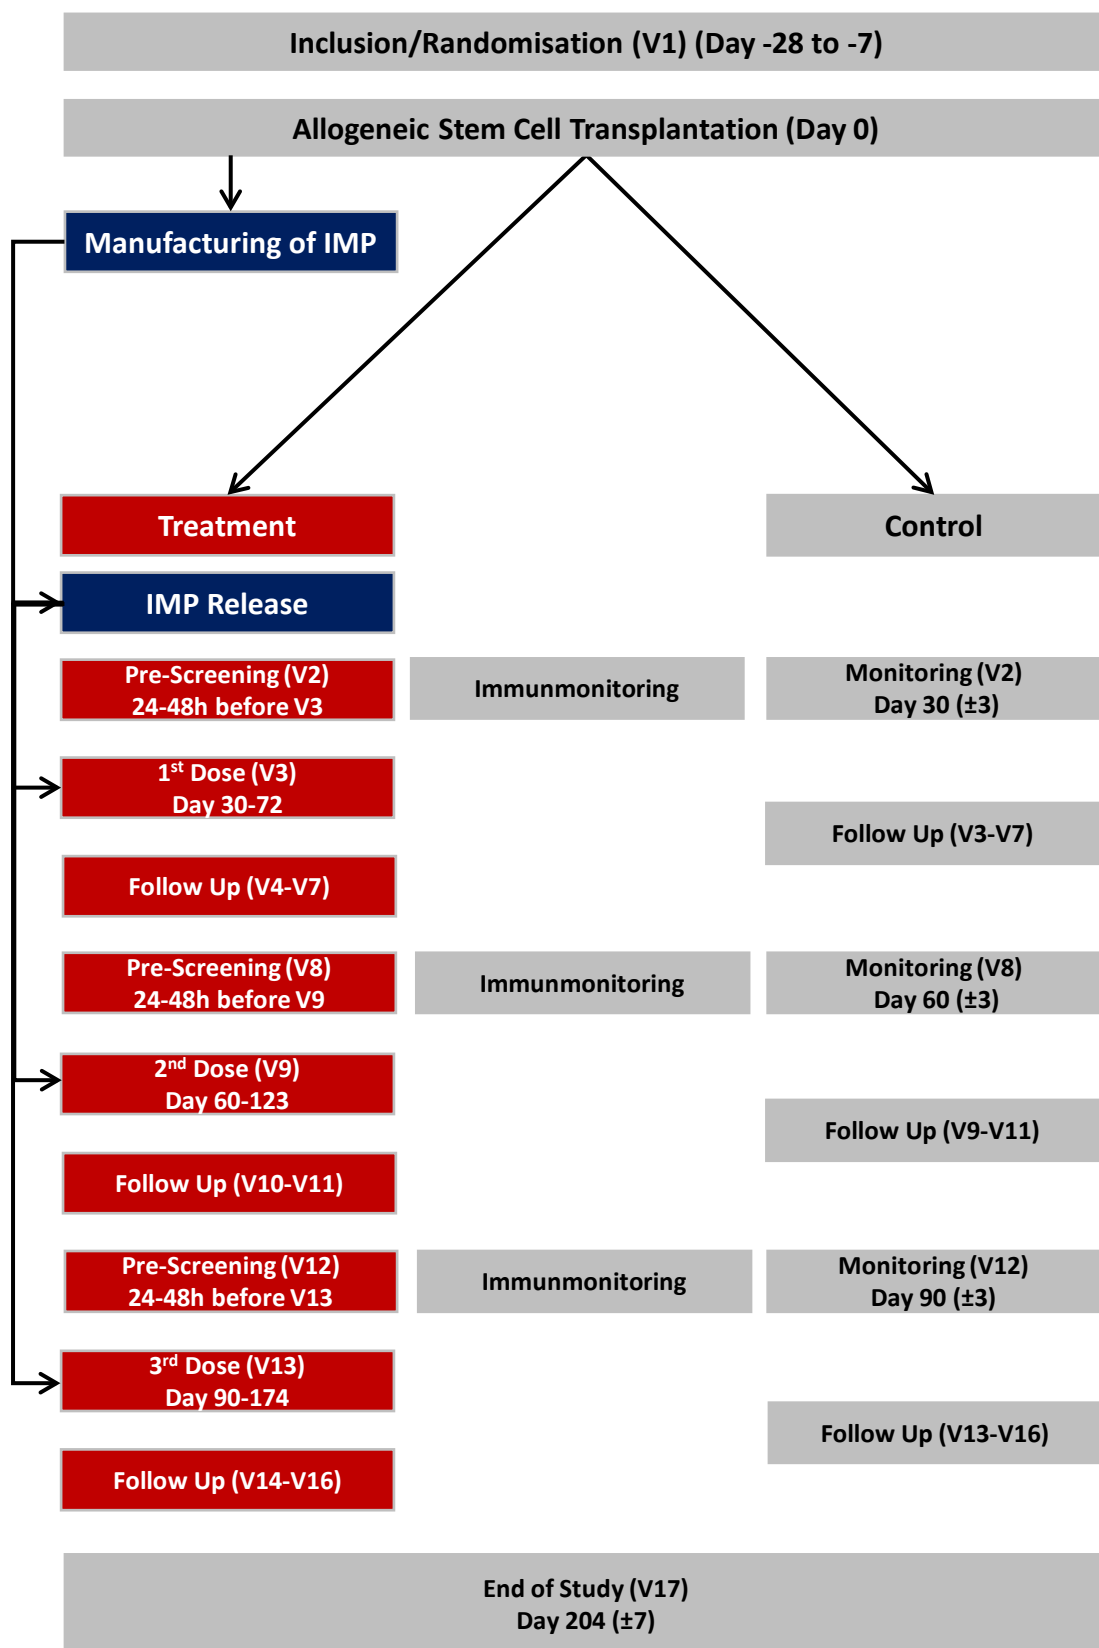

Supplementary Figure 2

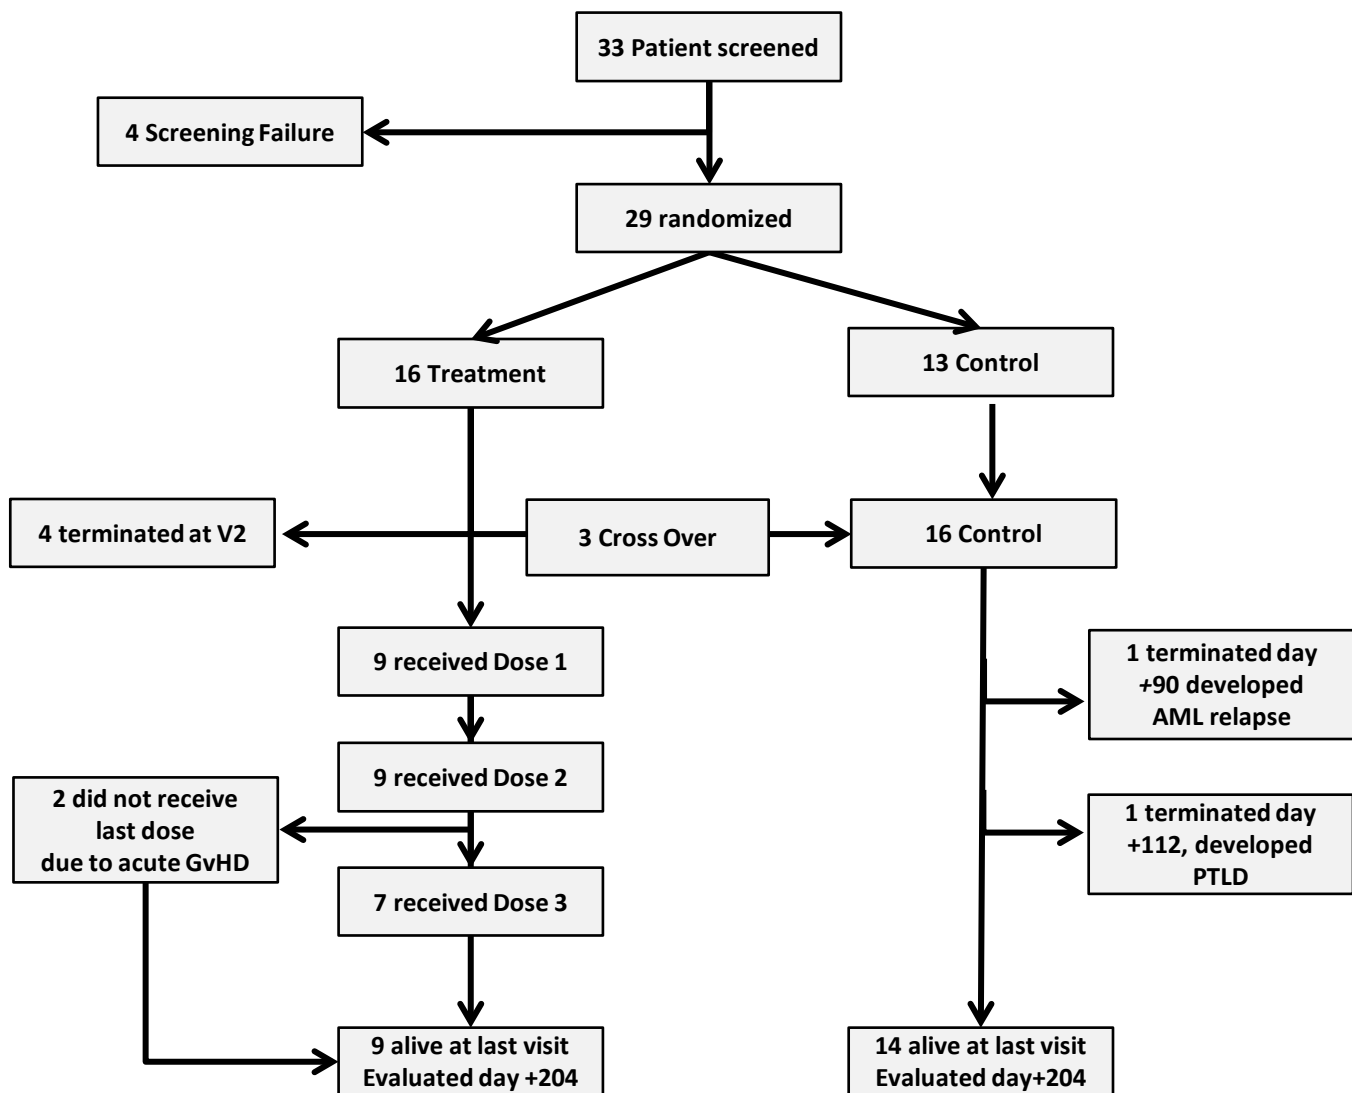

### Supplementary Figure 3

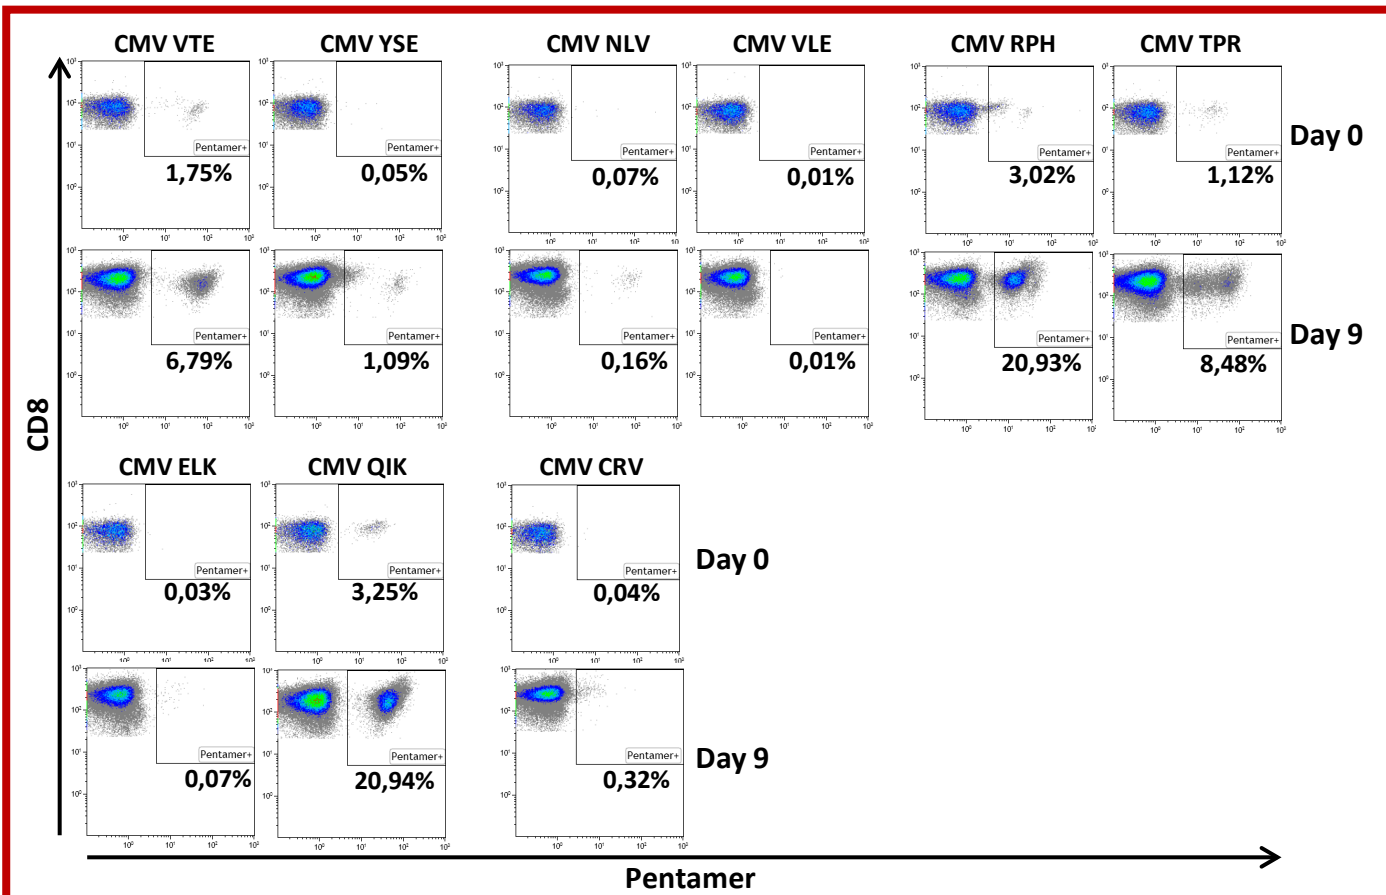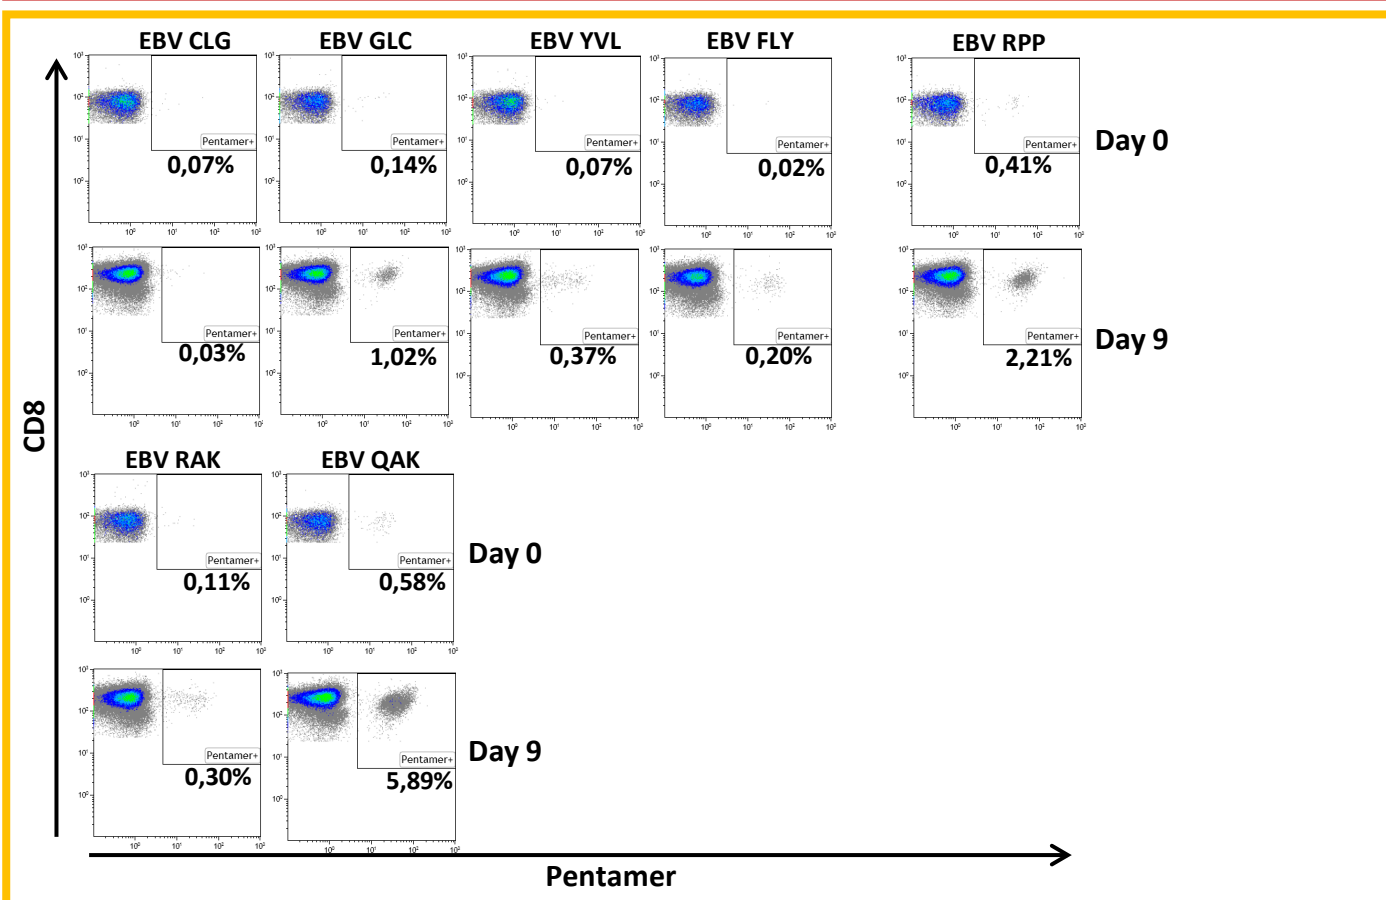

# Supplementary Figure 4

**A**

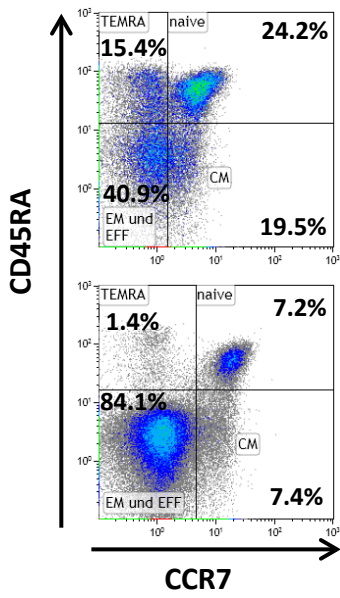

**B**

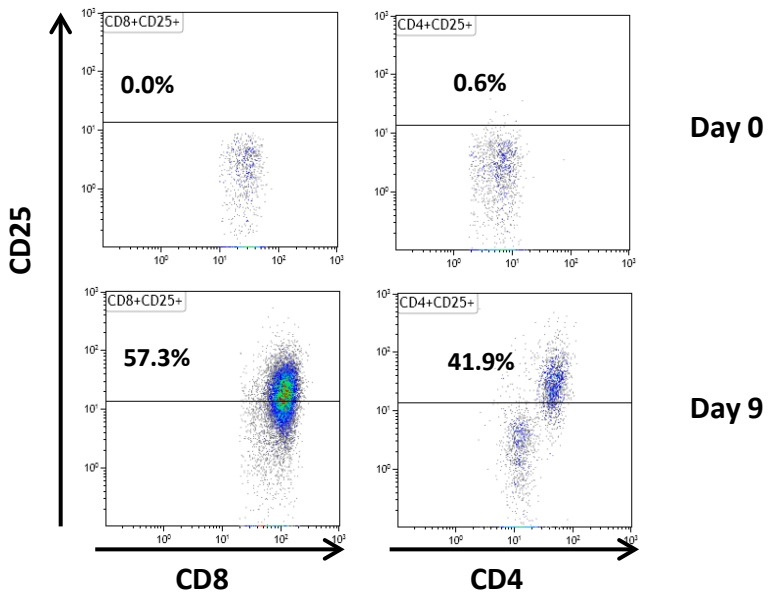

# Supplementary Figure 5

A

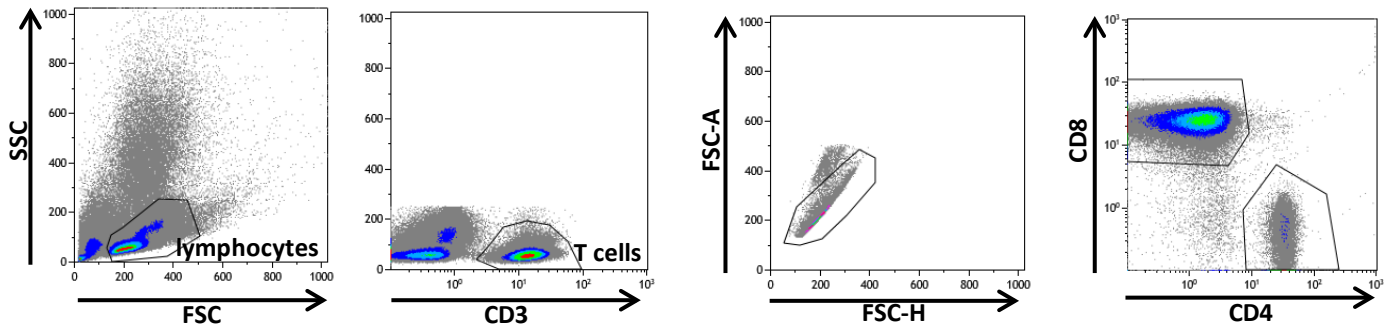

B

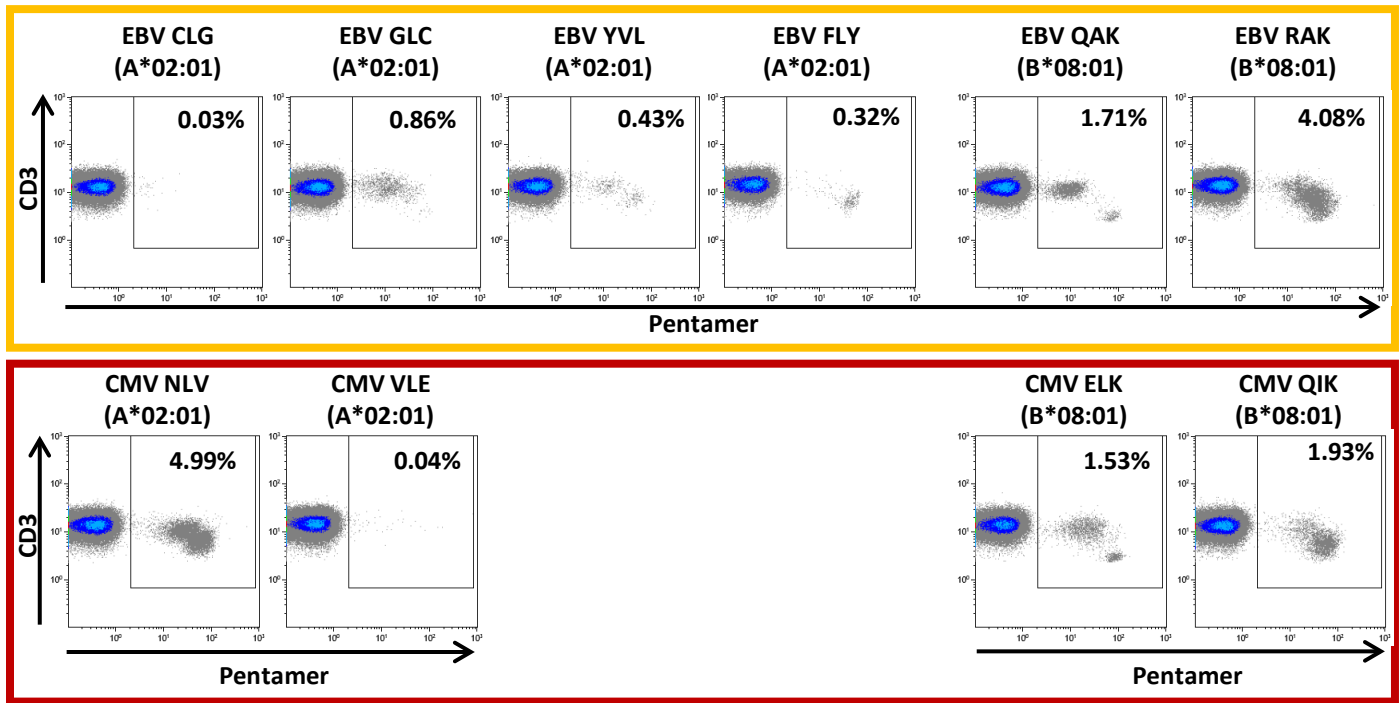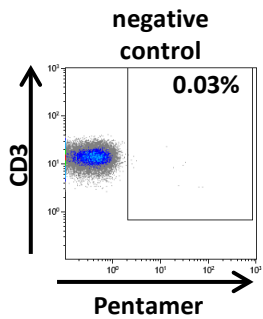

**Supplementary Table 1**

|                                                                         |                                                                                                                                           |
|-------------------------------------------------------------------------|-------------------------------------------------------------------------------------------------------------------------------------------|
| <b>Inclusion Criteria</b>                                               | Male or female between 18 and 75 years of age                                                                                             |
|                                                                         | Able to give to understand and consent to the study protocol. Ability to follow guidance by the study personal.                           |
|                                                                         | Written informed consent present after consultation by the study PI or delegate.                                                          |
|                                                                         | Hematologic or oncologic disease with indication for allogeneic stem cell transplantation                                                 |
|                                                                         | GCSF mobilized peripheral blood stem cells as stem cell source.                                                                           |
|                                                                         | Presence of at least one HLA gene locus as listed in addendum of the study protocol.                                                      |
|                                                                         | CMV-serostatus known (positive or negative)                                                                                               |
|                                                                         | EBV-serostatus known (positive or negative)                                                                                               |
|                                                                         | Female patients: menopausal, or adequate contraception for 12 months                                                                      |
| <b>Inclusion Criteria Donor</b>                                         | HLA match 10/10, related or unrelated                                                                                                     |
|                                                                         | EBV-serostatus positive                                                                                                                   |
|                                                                         | CMV-serostatus positive                                                                                                                   |
| <b>Exclusion Criteria Host</b>                                          | Bone marrow or cord blood as stem cell source.                                                                                            |
|                                                                         | Alemtuzumab (Campath®) containing conditioning regimen, or application less than 30 days before stem cell transplantation.                |
|                                                                         | Clinically relevant comorbidity with Sorrow score greater than 3                                                                          |
|                                                                         | Other severe conditions and organ dysfunction (cardiac insufficiency, NYHA III-IV, active Hepatitis B, severe respiratory insufficiency). |
|                                                                         | Severe psychological/psychiatric disorder.                                                                                                |
|                                                                         | Any other disease or medical condition that is not compatible with participation in the study, after evaluation by the PI.                |
|                                                                         | Known allergy against any ingredient of the study drug (DMSO).                                                                            |
|                                                                         | Pregnancy or breastfeeding                                                                                                                |
|                                                                         | Dependency or any relationships between sponsor or PI.                                                                                    |
|                                                                         | Planned absence after treatment that interferes with visit schedule.                                                                      |
|                                                                         | Participation in other clinical trials with application of not approved substances.                                                       |
| <b>Exclusion Criteria Donor</b>                                         | EBV-serostatus negative                                                                                                                   |
|                                                                         | CMV-serostatus negative                                                                                                                   |
| <b>Additional inclusion criteria before each application of the IMP</b> | No signs of acute infection (Temp. >38.0C)                                                                                                |
|                                                                         | Any other disease or medical condition that is not compatible with participation in the study, after evaluation by the PI.                |
|                                                                         | No clinical or laboratory evidence for acute GvHD Glucksberg II-IV                                                                        |
|                                                                         | No systemic therapy with prednisolon (or equivalent) >0.5mg/kg bodyweight.                                                                |
|                                                                         | No steroid refractory GvHD                                                                                                                |
